# Supplementary material
Source: MDPI journal article supplement (https://www.mdpi.com/2305-6320/7/11/68)
Supplement: s1 [file s1]

# Supplementary Materials: Identification and Classification of Polymyalgia Rheumatica (PMR) and PMR-Like Syndromes Following Immune Checkpoint Inhibitors (ICIs) Therapy: Discussion Points and Grey Areas Emerging from a Systematic Review of Published Literature.

Ciro Manzo, Marco Isetta, Maria Natale and Alberto Castagna

**Table 1.** General data

|                         |
|-------------------------|
| First author            |
| Title                   |
| Journal                 |
| Year                    |
| Volume and Page Numbers |
| Language of Publication |
| Population              |
| Age                     |
| Sex                     |

**Table 2.** PMR criteria used and study design.

| PMR Criteria Used | N. | Study Design      | N. |
|-------------------|----|-------------------|----|
| Chuang            |    | Cohort            |    |
| Bird              |    | Case control      |    |
| Jones             |    | Retrospective     |    |
| Nobunaga          |    | Observational     |    |
| Healey            |    | Systematic Review |    |
| Hunder            |    | Case report       |    |
| 2012 EULAR-ACR    |    |                   |    |
| Not referenced    |    |                   |    |

**Table 3.** PMR and PMR-like syndromes as an adverse drug reaction (ADR) .

| Temporal Relationship with ICIs Therapy : |        |                        |
|-------------------------------------------|--------|------------------------|
| PMR evaluated as an ADR:                  | YES/NO | – If yes, specify how: |
| PMR-like syndromes evaluated as an ADR:   | YES/NO | – If yes, specify how: |
